# Supplementary material
Source: MDPI journal article supplement (https://www.mdpi.com/2079-9276/8/2/112)
Supplement: s1 [file s1]

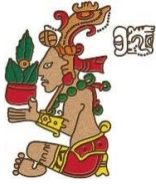

## South-Eastern Mexico Landholder Survey

Dear Participant,

Thank you for agreeing to participate in this important survey of landholders in South-Eastern Mexico! My name is Brian Witt, and I am a researcher at the Technical University of Vienna (TU Wien). The survey you will be completing will help lead to a better understanding of preferences of Mexican landholders. All data collected will be treated with confidentiality and will be used solely for scientific purposes.

If you have any questions on these topics, please do not hesitate to ask! Thank you again for your participation in this survey – research depends on the help of participants like you!

Sincerely,

Brian Witt

Date: \_\_\_\_\_

Location: \_\_\_\_\_

### **Landholder Questionnaire**

Before you answer any of the survey questions below, it is important that you, as a participant in this survey, are informed of your rights and the manner in which the information you provide will be treated.

During and subsequent to the conduct of this survey:

- **There is no 'right' or 'wrong' answer to any of the questions below; your honest opinion is what is needed.**
- **No personal information or personally-identifiable data will be stored or disseminated to any third party.**
- **At no point in the finished research report will you be identified in any manner.**
- **You may feel free to ask questions at any point in the survey on any aspect of the survey or underlying research.**
- **If at any time you no longer wish to continue your participation in this survey, you may withdraw.**

If you have any questions about this informed consent policy, please do not hesitate to ask.

**When completing the survey, please check the circle or fill in the space provided with the response that best fits your circumstances or opinion.**

What is your gender?

☐ Male    ☐ Female    ☐ \_\_\_\_\_

What is your age?

☐ Under 30    ☐ 30-50    ☐ Over 50

Would you say that you are better off or worse off, financially, than the average member of your community, thinking of income, landholdings, savings, etc.?

☐ Better Off    ☐ Worse Off

Which of these categories best represents the highest level of education you have completed?

☐ Less than Primary Education    ☐ Primary Education    ☐ Secondary Education or Above

Which of these categories best represents the size of landholdings that your household owns or has leasehold over?

☐ Less 10 hectares    ☐ 10 – 20 hectares    ☐ 20 – 30 hectares    ☐ More than 30 hectares

Which of these categories best represents the total annual income your household earns from non-farm activities, including remittances?

☐ Less MX\$7500    ☐ MX\$7500 – MX\$15000    ☐ MX\$15000 – MX\$22500    ☐ More than MX\$22500

Thinking about the follow statement, “**Intact forests provide important benefits to people, including to farmers**” do you:

☐ **Disagree**   ☐ **Neither Agree nor Disagree**   ☐ **Agree**

Thinking about the follow statement, “**The protection of forests should sometimes take priority over economic growth or the opening of new agricultural lands,**” do you:

☐ **Disagree**   ☐ **Neither Agree nor Disagree**   ☐ **Agree**

Thinking about the actions that the government is taking to protect forests **within your area**, do you believe they are doing:

☐ **Too Much**   ☐ **About Right**   ☐ **Not Enough**

Have you heard or and are you familiar with **Payment for Ecosystem Services (PES)**?

☐ **YES**   ☐ **NO**

How much trust do you have in governmental institutions (federal, state, and local)?

☐ **Little Trust**   ☐ **Some Trust**   ☐ **A Great Deal of Trust**

*Please carefully consider the following statement before answering the questions below:*

As a member of an ejido, you have a voice in decision-making impacting your community, including managing common forest lands. Consider a situation where two offers have been presented to the ejido as means to earn income from the land:

**Offer A:** A landowner from a neighboring community has made an offer to lease a portion of the communal forest lands for 5 years. He plans to graze cattle on the land, and will undertake some clearing of trees.

**Offer B:** The government is interested in enrolling the same portion of land into a Payment for Ecosystem Services (PES) program for 5 years. They plan to ensure the production of environmental goods and services by conserving the land as is.

If the ejido accepts Offer A, your household will be paid MX\$1800 each year, for 5 years, as your share of the lease income. The PES program struggles to match this offer, but makes the ejido a counter offer.

*When answering the following questions, please be sure to consider your overall budget and your general spending and expenses.*

Given the scenario above, would you be willing to accept [MX\$1000, 1400, 1800] per year for 5 years, and vote to accept Offer B, enrolling the land in a PES program, over **Offer A**?

☐ YES   ☐ NO

How confident are you in your answer to the above questions?

☐ Very Unsure   ☐ Somewhat Unsure   ☐ Somewhat Confident   ☐ Very Confident

If you answered **NO**, what is the primary reason you would not be willing to accept [MX\$1000, 1400, 1800] per year for 5 years, and vote to accept Offer B, enrolling the land in a PES program, over **Offer A**?

---

**Thank you very much for completing this survey and taking part in this important research!**
